# Supplementary material for: Efficient Sequestration of Hexavalent Chromium by Graphene-Based Nanoscale Zero-Valent Iron Composite Coupled with Ultrasonic Pretreatment
Source: MDPI journal article supplement (doi:10.3390/ijerph18115921), 2021-05-31
Supplement: s1 [file s1]

Supplementary materials

# **Efficient sequestration of hexavalent chromium on graphene-based nanoscale zerovalent iron composite coupling with ultrasonic pre-treatment**

**Haiyan Song <sup>1</sup>, Wei Liu <sup>1</sup>, Fansheng Meng <sup>2</sup>, Qi Yang <sup>1,\*</sup> and Niandong Guo <sup>1</sup>**

<sup>1</sup> School of Water Resources and Environment, Beijing Key Laboratory of Water Resources and Environmental Engineering, and Environmental Engineering, and MOE Key Laboratory of Groundwater Circulation and Environmental Evolution, China University of Geosciences (Beijing), Beijing 100083, PR China

<sup>2</sup> Chinese Research Academy of Environmental Sciences, Beijing 100012, PR China

\* Correspondence: yq@cugb.edu.cn (Q. Y.)

## 1. Materials and methods

### 1.1 Materials

All of the chemicals used in the study were of analytical grade. Iron(III) chloride hexahydrate ( $\text{FeCl}_3 \cdot 6\text{H}_2\text{O}$ ), sodium borohydride ( $\text{NaBH}_4$ ), potassium dichromate ( $\text{K}_2\text{Cr}_2\text{O}_7$ ), acetone ( $\text{CH}_3\text{COCH}_3$ ), and diphenylcarbazide ( $\text{C}_6\text{H}_5(\text{NH})_2\text{CO}(\text{NH})_2\text{C}_6\text{H}_5$ ) were purchased from Sinopharm Chemical Reagent Co. Ltd., China. Hydrochloric acid ( $\text{HCl}$ , 36%-38%), sodium hydroxide ( $\text{NaOH}$ ), phosphoric acid ( $\text{H}_3\text{PO}_4$ , 85%), and sulfuric acid ( $\text{H}_2\text{SO}_4$ , 98%) were purchased from Beijing Chemical Works, China. Deionized water was used throughout the experiments.

### 1.2 preparation of nZVI

nZVI was synthesized with a classic method of chemical reduction, as previously reported [1]. Briefly, 100 mL 0.5 M of a  $\text{NaBH}_4$  aqueous solution was added dropwise into 200 mL 0.045 M  $\text{FeCl}_3 \cdot 6\text{H}_2\text{O}$  aqueous solution by peristaltic pump (revolving speed 20 rpm) at an ambient temperature with strong mechanical agitation. Fe(III) was reduced to Fe(0), according to the following reaction (Equation 1) [2]:

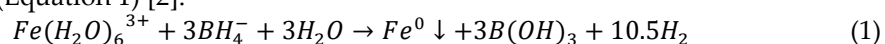

The process was proceeded by sparking with pure nitrogen (99.99%), which was stopped half an hour after adding the  $\text{NaBH}_4$  aqueous solution. Afterwards, the mixture was settled for 1 h, and then the precipitate was washed several times by deoxy-deionized water and ethanol. Finally, the solid obtained was dried by vacuum freeze-drying (SiHuan, Beijing, China) and preserved in a seal.

## 2. Reactivity test

Table S1. PSO kinetic parameters of nZVI/rGO coupled with ultrasonic pre-treatment.

| System       | Equation                     | $k_{ad}$ (g mg <sup>-1</sup> min <sup>-1</sup> ) | $q_e$ (mg g <sup>-1</sup> ) | $R^2$  |
|--------------|------------------------------|--------------------------------------------------|-----------------------------|--------|
| Aerobic      | $t/q_t = 0.02606 + 0.01303t$ | 0.0065                                           | 76.75                       | 0.9976 |
| US/aerobic   | $t/q_t = 0.00538 + 0.01318t$ | 0.032                                            | 75.87                       | 0.9969 |
| Anaerobic    | $t/q_t = 0.0212 + 0.01236t$  | 0.0072                                           | 80.90                       | 0.9959 |
| US/anaerobic | $t/q_t = 0.00415 + 0.01219t$ | 0.036                                            | 82.03                       | 0.9996 |

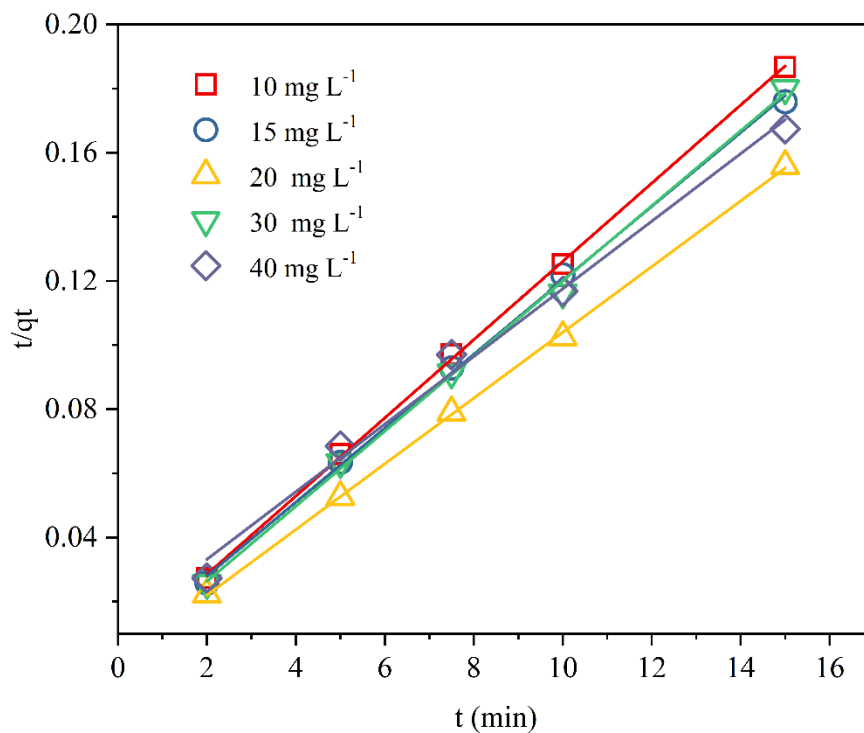

**Figure S1.** The fitted curves of the PSO model for US-nZVI/rGO system.

Table S2. Parameters obtained from PSO kinetic model for US-nZVI/rGO system.

| Initial<br>concentration (mg<br>L <sup>-1</sup> ) | Equation                     | $k_{ad}$ (g mg <sup>-1</sup><br>min <sup>-1</sup> ) | $q_e$ (mg g <sup>-1</sup> ) | $R^2$  |
|---------------------------------------------------|------------------------------|-----------------------------------------------------|-----------------------------|--------|
| 10                                                | $t/q_t = 0.00415 + 0.01219t$ | 0.036                                               | 82.03                       | 0.9996 |
| 15                                                | $t/q_t = 0.00495 + 0.01152t$ | 0.027                                               | 86.81                       | 0.9989 |
| 20                                                | $t/q_t = 0.00152 + 0.01024t$ | 0.069                                               | 97.66                       | 0.9997 |
| 30                                                | $t/q_t = 0.00292 + 0.01171t$ | 0.047                                               | 85.40                       | 0.9985 |
| 40                                                | $t/q_t = 0.01212 + 0.01054t$ | 0.0092                                              | 94.88                       | 0.9918 |

### 3. Characterization

#### 3.1 EDS

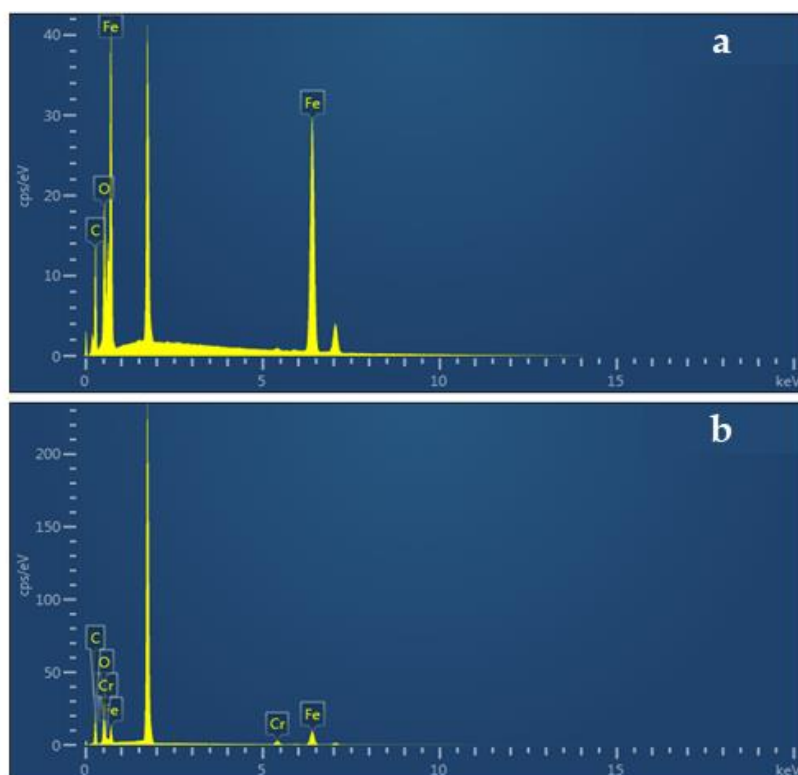

**Figure S2.** EDS spectra of a) nZVI/rGO and b) nZVI/rGO after reaction.

Table S3. The mass ratio of each element from EDS.

| <b>nZVI/rGO</b> |            | <b>nZVI/rGO after reaction</b> |            |
|-----------------|------------|--------------------------------|------------|
| elements        | <i>wt%</i> | elements                       | <i>wt%</i> |
| C               | 15.18      | <b>C</b>                       | 26.22      |
| O               | 7.20       | <b>O</b>                       | 28.97      |
| Fe              | 77.62      | <b>Fe</b>                      | 39.17      |
|                 |            | Cr                             | 5.64       |
| Total           | 100.00     | Total                          | 100.00     |

### 3.2 BET

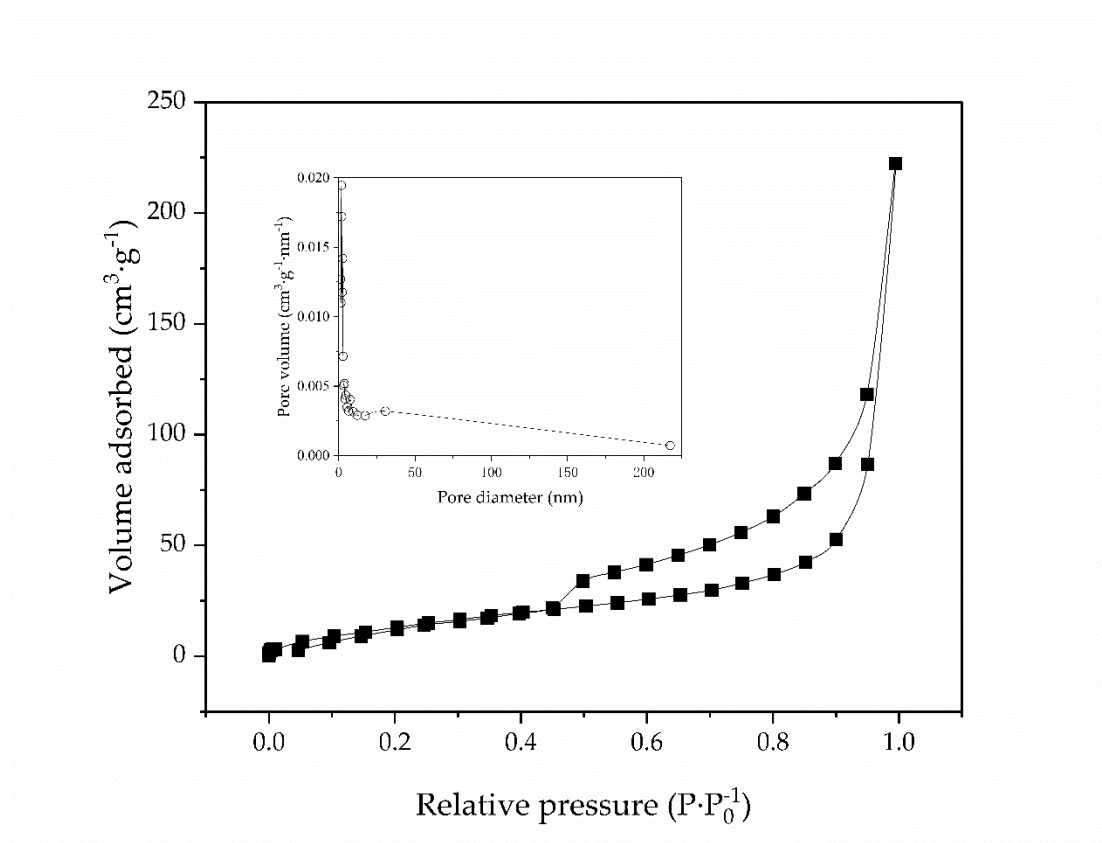

**Figure S3.** Nitrogen adsorption-desorption isotherms and pore size distribution curve (the insert pattern) for nZVI/rGO.

Table S4. Physical and chemical properties of nanoparticles investigated in this study.

| Sample   | $S_{\text{BET}}$ ( $\text{m}^2 \text{g}^{-1}$ ) | Pore size<br>(nm) | Pore<br>volume<br>( $\text{cm}^3 \text{g}^{-1}$ ) | Reference                         |
|----------|-------------------------------------------------|-------------------|---------------------------------------------------|-----------------------------------|
| GO       | 1.23                                            |                   |                                                   | this study                        |
| nZVI     | 14.56                                           | 4.12              | 0.11                                              | previous study of<br>our group[3] |
| nZVI/rGO | 59.31                                           | 2.324             | 0.345                                             | this study                        |



Table S5. BET specific surface area of nZVI in the previous studies.

| <b>material</b>   | <b>Synthesis<br/>method</b> | <b>Specific surface<br/>area (m<sup>2</sup> g<sup>-1</sup>)</b> | <b>Reference</b> |
|-------------------|-----------------------------|-----------------------------------------------------------------|------------------|
| <b>Nano Pd/Fe</b> | NaBH <sub>4</sub> reduction | 33.5                                                            | [2]              |
| <b>nZVI</b>       | NaBH <sub>4</sub> reduction | 24.4                                                            | [4]              |
| <b>nZVI</b>       | NaBH <sub>4</sub> reduction | 25                                                              | [5]              |
| <b>nZVI</b>       | NaBH <sub>4</sub> reduction | 14.2                                                            | [6]              |

### 3.3 XPS

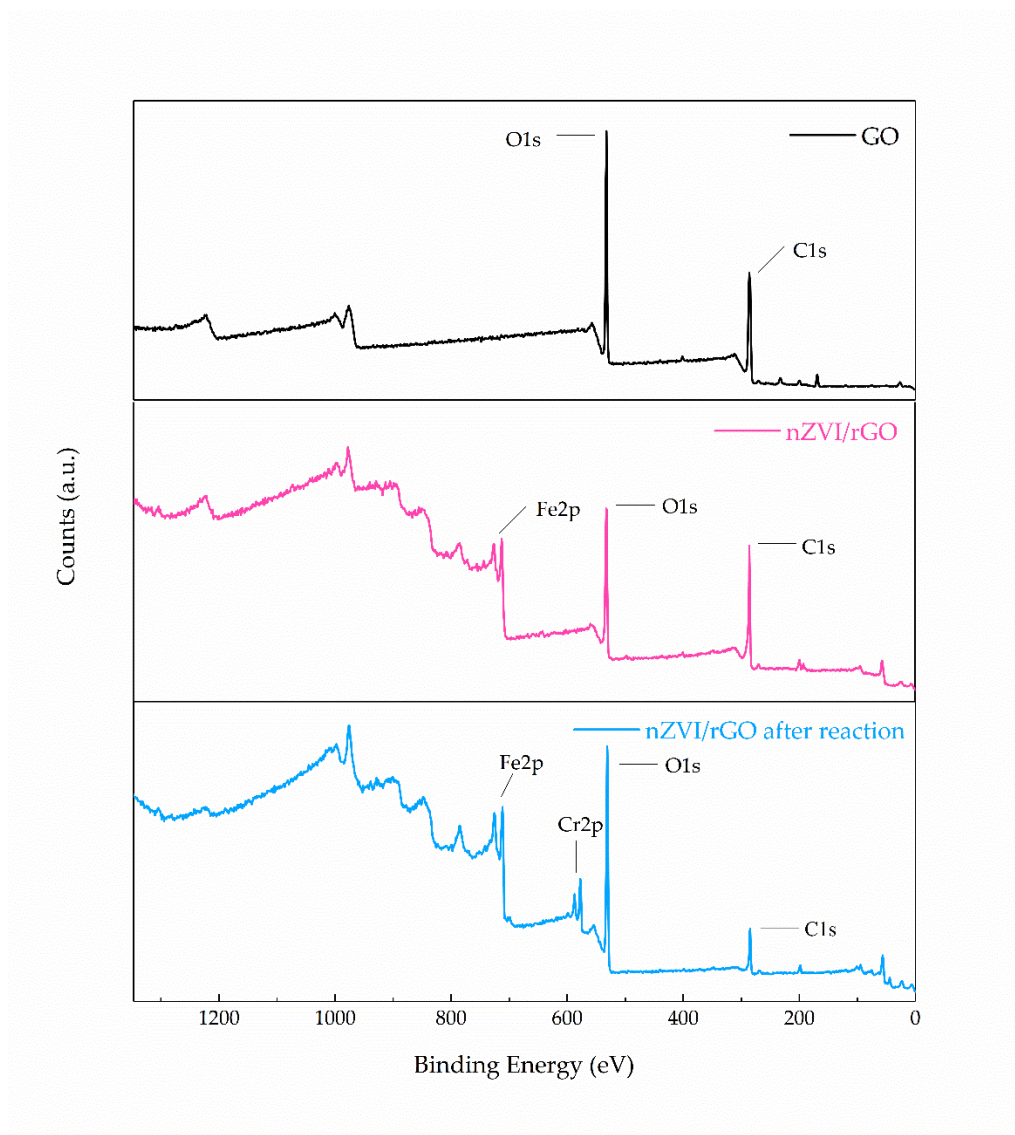

**Figure S4.** Full survey XPS patterns for nZVI/rGO, nZVI/rGO after reaction, and GO.

**Table S6.** The peak area fraction of carbon-containing groups.

| Groups | GO             | Groups | nZVI/rGO       | Groups | nZVI/rGO after reaction |
|--------|----------------|--------|----------------|--------|-------------------------|
|        | Percentage (%) |        | Percentage (%) |        | Percentage (%)          |
| C-C    | 44.06          | C-C    | 62.45          | C-C    | 63.13                   |
| C-O    | 6.62           | C-O    | 20.76          | C-O    | 20.96                   |
| C=O    | 40.32          | C=O    | 9.15           | C=O    | 4.92                    |
| O-C=O  | 9.00           | O-C=O  | 7.65           | O-C=O  | 10.99                   |

#### 4. Mechanism

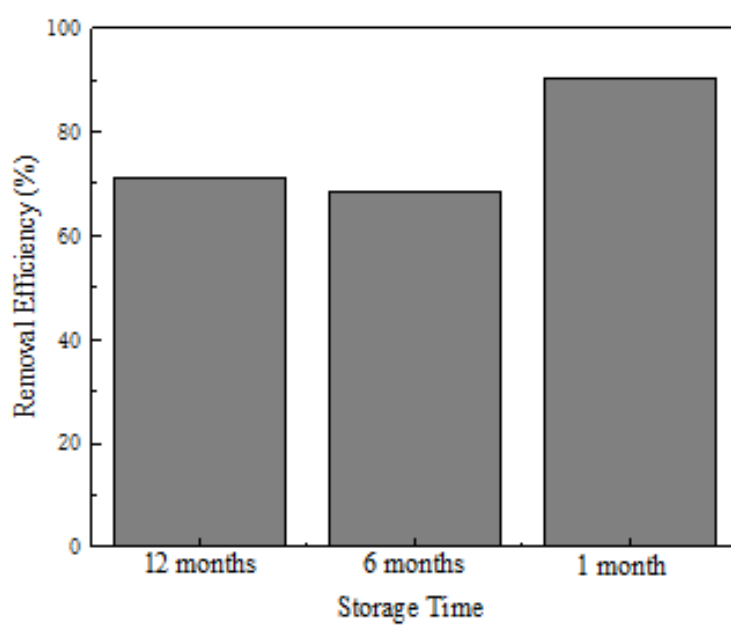

Figure S5. Influence of storage time.

## Reference

1. Stefaniuk, M.; Oleszczuk, P.; Ok, Y.S. Review on nano zerovalent iron (nZVI): From synthesis to environmental applications. *Chemical Engineering Journal* **2016**, *287*, 618-632, doi:10.1016/j.cej.2015.11.046.
2. Wang C.B., Z.W.X. Synthesizing Nanoscale Iron Particles for Rapid and Complete Dechlorination of TCE and PCBs. *Environmental Science & Technology* **1997**, *31*, 2154-2156, doi:10.1021/es970039c.
3. Ma, Y.; Lv, X.; Yang, Q.I.; Wang, Y.; Chen, X. Reduction of carbon tetrachloride by nanoscale palladized zero-valent iron@ graphene composites: Kinetics, activation energy, effects of reaction conditions and degradation mechanism. *Applied Catalysis A: General* **2017**, *542*, 252-261, doi:10.1016/j.apcata.2017.05.028.
4. Kanel, S.R.; Manning, B.; Charlet, L.; Choi, H. Removal of arsenic(III) from groundwater by nanoscale zero-valent iron. *Environ Sci Technol* **2005**, *39*, 1291-1298, doi:10.1021/es048991u
5. Kanel, S.R.G., J. M.; Choi, H. Arsenic(V) Removal from Groundwater Using Nano Scale Zero-Valent Iron as a Colloidal Reactive Barrier Material. *Environ Sci Technol* **2006**, *40*, 2045-2050, doi:10.1021/es0520924
6. Uzum, C.; Shahwan, T.; Eroglu, A.E.; Lieberwirth, I.; Scott, T.B.; Hallam, K.R. Application of zero-valent iron nanoparticles for the removal of aqueous  $\text{Co}^{2+}$  ions under various experimental conditions. *Chem Eng J* **2008**, *144*, 213-220, doi:10.1016/j.cej.2008.01.024.
